# Supplementary material for: Absolute numbers of regulatory T cells and neutrophils in corticosteroid-free patients are predictive for response to bevacizumab in recurrent glioblastoma patients
Source: Springer Nature journal article supplement (doi:10.1007/s00262-019-02317-9), 2019-03-04
Supplement: MOESM1 [file 16523842]

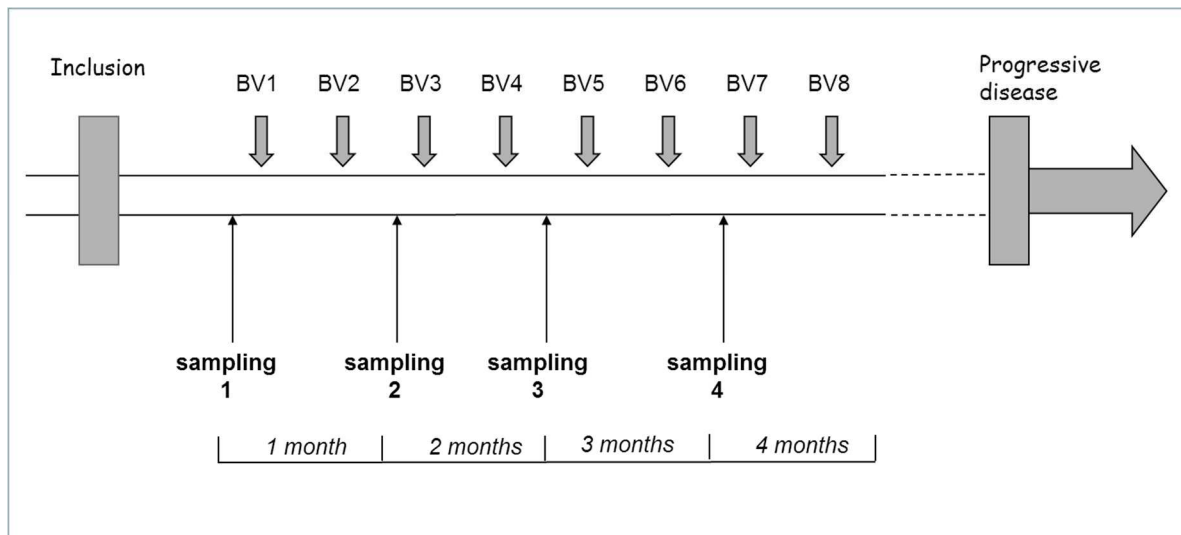

**Sup Figure1: Flow chart showing the study design.**

A/

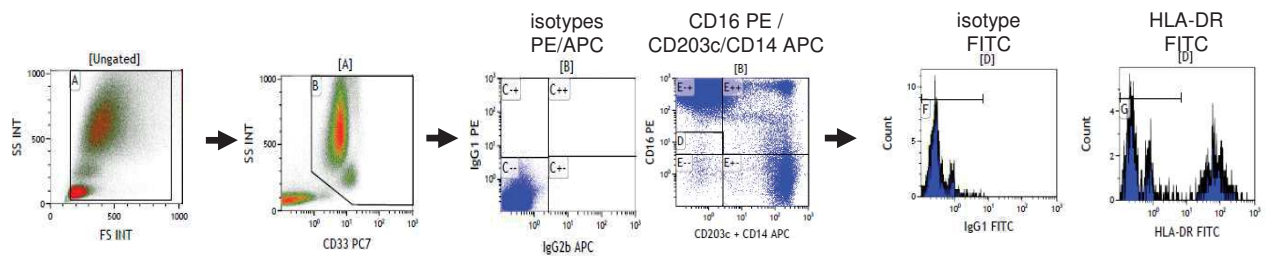

B/

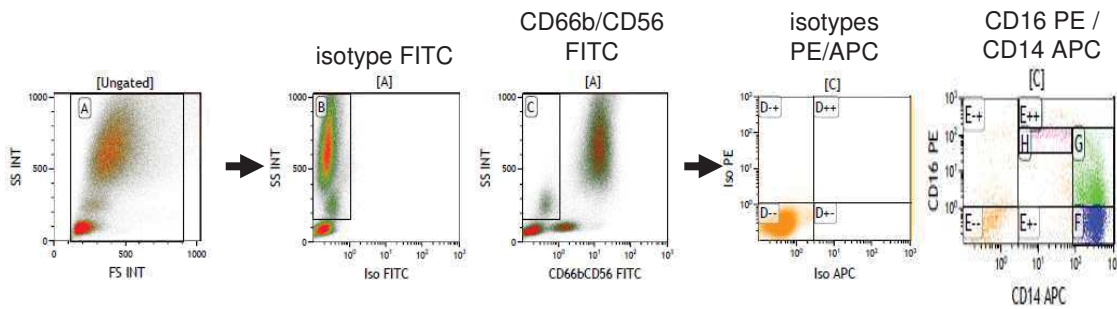

C/

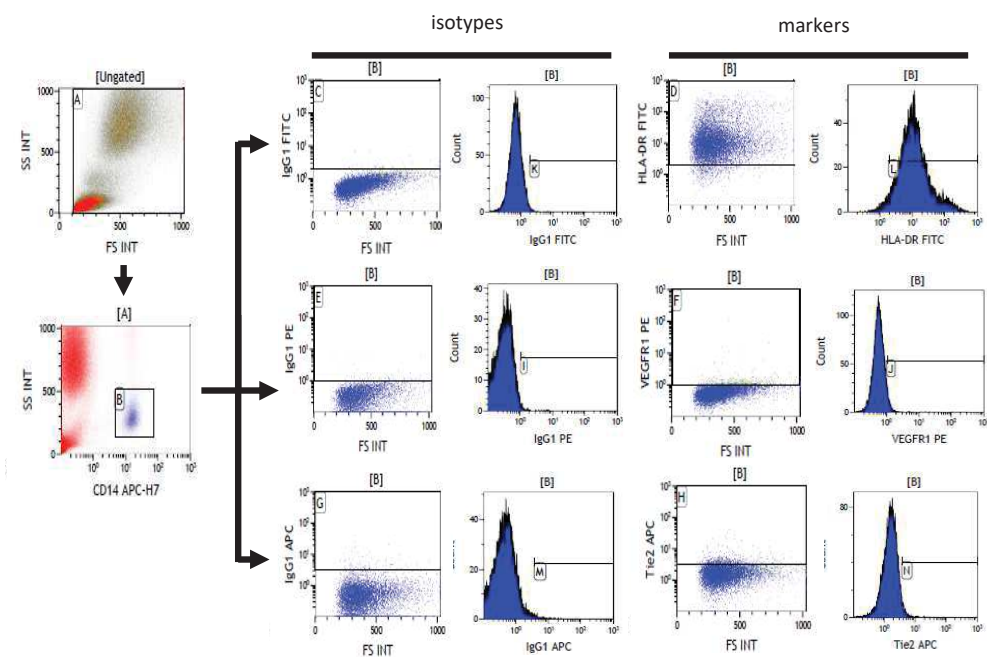

D/

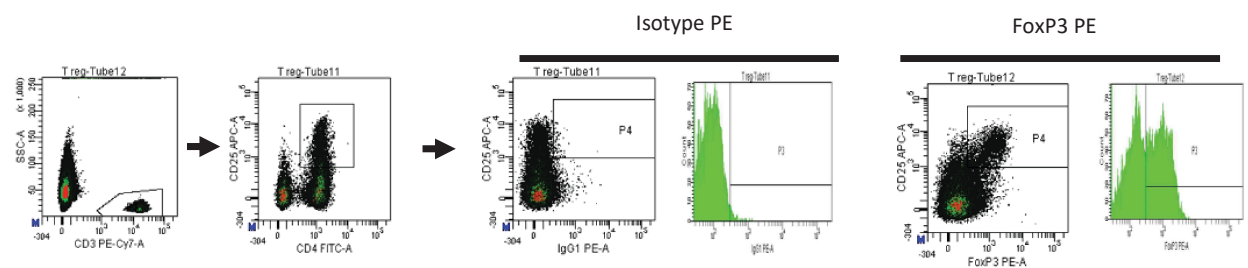

**Sup Figure 2: FACS analysis of the different leukocyte populations.** For each tube, 200  $\mu$ l of whole blood was first incubated with 20  $\mu$ l of Fc blocking for 5 minutes. A second 20-minute incubation period was performed after the addition of the mAb, followed by red blood cell lysis. Finally, samples were diluted with 0.5 ml PBS before analysis. **A/ MDSCs analysis.** MDSC were defined as CD33<sup>+</sup>/CD203<sup>-</sup>/CD14<sup>-</sup>/CD16<sup>-low</sup>/HLA-DR<sup>-</sup>. After debris exclusion in a forward/side scatter (FSC/SCC), CD33<sup>+</sup> cells were selected and separated based on CD16/CD14 and CD203c expression. Isotype controls were used to define CD16-CD14-CD203c- cell population and HLA-DR positive cells. **B/ Different monocytes subsets.** classical, intermediate and non-classical monocytes were identified as CD14<sup>high</sup>/CD16<sup>-</sup>, CD14<sup>high</sup>/CD16<sup>+</sup> and CD14<sup>low</sup>/CD16<sup>+</sup>, respectively. After debris exclusion in a forward/side scatter (FSC/SCC), the population CD56<sup>-</sup>/CD66b<sup>-</sup> with an intermediate side scatter was selected. Isotype controls were used to define CD66b/CD56 negative cells and to set the quadrant to define CD14/CD16 expression on monocytes. **C/ HLA-DR-, VEGFR1 and Tie2 expression on CD14<sup>+</sup> monocytes.** After debris exclusion in a forward/side scatter (FSC/SCC), CD14<sup>+</sup> cells were selected and percentages of cells not expressing HLA-DR, expressing VEGFR1 or Tie2 were calculated. Isotype controls were used to define HLA-DR, VEGFR1 and Tie2 positive cells. **F/ Treg.** A step of fixation/permeabilisation of cells was done before intracytoplasmic FOXP3 staining. Treg cells were identified as CD3<sup>+</sup>/CD4<sup>+</sup>/CD25<sup>high</sup>/FOXP3<sup>+</sup> cells. Isotype controls were used to define FoxP3 positive T cells.

**Supplementary Table I. List of antibodies used for FACS analysis**

| Antibody    | Manufacturer     | Reference  |
|-------------|------------------|------------|
| CD3-PECy7   | Beckman Coulter  | 737657     |
| CD4-FITC    | eBiosciences     | 22-0425-73 |
| CD14-APC    | Becton Dickinson | 345787     |
| CD14-APCH7  | Becton Dickinson | 560180     |
| CD16-PE     | Becton Dickinson | 555407     |
| CD25-APC    | eBiosciences     | 22-0425-73 |
| CD33-PECy7  | Beckman Coulter  | A54824     |
| CD56-FITC   | Becton Dickinson | 345811     |
| CD66b-FITC  | Beckman Coulter  | IM0531U    |
| CD203c      | BioLegend        | 324610     |
| FOXP3-PE    | eBiosciences     | 12-4776-42 |
| HLA-DR-FITC | Beckman Coulter  | I1638U     |
| Tie2-APC    | R&D              | FAB3131A   |
| VEGFR1-PE   | R&D              | FAB321P    |
